# Supplementary material for: Adipose- and muscle-derived Wnts trigger pancreatic β-cell adaptation to systemic insulin resistance
Source: PubMed Central journal article supplement (PMC4985739; doi:10.1038/srep31553), 2016-08-16
Supplement: srep31553-s1.pdf [file srep31553-s1.pdf]

## **Supplementary Materials**

### **Adipose- and muscle-derived Wnts trigger pancreatic $\beta$ -cell adaptation to systemic insulin resistance**

**Kamil Kozinski<sup>1</sup>, Magdalena Jazurek<sup>1</sup>, Pawel Dobrzyn<sup>2</sup>, Justyna Janikiewicz<sup>1</sup>, Katarzyna  
Kolczynska<sup>1</sup>, Anna Gajda<sup>1</sup> & Agnieszka Dobrzyn<sup>1</sup>**

<sup>1</sup>Laboratory of Cell Signaling and Metabolic Disorders, Nencki Institute of Experimental Biology,  
Polish Academy of Sciences, Warsaw, Poland

<sup>2</sup>Laboratory of Medical Molecular Biochemistry, Nencki Institute of Experimental Biology, Polish  
Academy of Sciences, Warsaw, Poland

#### **Correspondence:**

Agnieszka Dobrzyn

E-mail: [adobrzyn@nencki.gov.pl](mailto:adobrzyn@nencki.gov.pl)

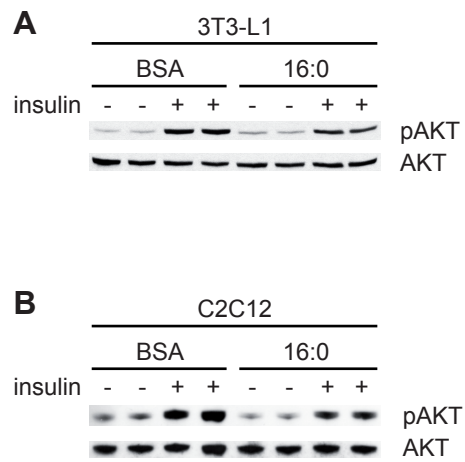

**Supplementary Figure 1.** Palmitate (16:0) treatment induced insulin resistance in 3T3-L1 (a) and C2C12 (b) cells. The protein level of AKT and extent of phosphorylation of AKT at Ser473 in BSA- and palmitate-treated cells were analyzed by Western blot.

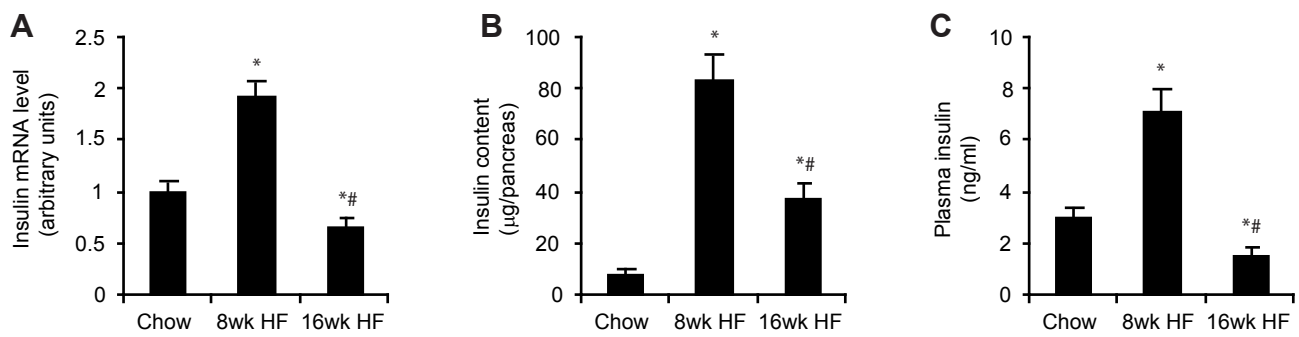

**Supplementary Figure 2.** Effect of high-fat feeding on insulin mRNA level in pancreas (a) and on insulin content in whole pancreas (b) and in blood plasma (c). Rats were fed high-fat diet for 8 or 16 weeks. mRNA level was measured by real-time PCR. Insulin content was measured using a Rat/Mouse Insulin ELISA Kit (Millipore), according to manufacturer's protocol. The data are expressed as mean  $\pm$  SD, n = 6. \*P < 0.05 vs CHOW group; #P < 0.05 vs 8wk HF group.
